# Supplementary material
Source: publisher figshare collection journal article supplement (https://plos.figshare.com/articles/dataset/_/6065087)
Supplement: Supplementary file [file 1]

El Comité Ético de Investigación Clínica en la reunión de 30 de octubre de 2008, acta 13/2008, informó favorablemente la solicitud del proyecto de investigación titulado: **“Evolución del proceso de fragilidad de la población mayor de Lleida”** con la Dra. Pilar Jürschik Jiménez como investigadora principal en la Escuela Universitaria de Enfermería de la Universitat de Lleida, y consideró que:

- Se cumplen los requisitos necesarios de idoneidad del protocolo en relación a los objetivos del estudio y que estan justificados los riesgos y molestias previsibles para los sujetos participantes.
- La capacidad del investigador y los medios de que dispone son apropiados para llevar a cabo el estudio.
- Es adecuado el procedimiento para obtener el consentimiento informado de los sujetos que participan en el estudio.

Lleida, 27 de noviembre de 2008

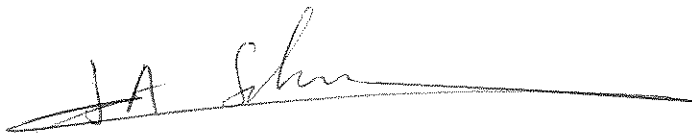

Joan Antoni Schoenenberger Arnaiz  
Presidente
